# Supplementary material
Source: Springer Nature journal article supplement (https://www.springermedizin.de/resource/supplementary/12936_2012_2215_MOESM2_ESM.pdf/9542846)
Supplement: MOESM2 [file 9542846]

**Table 4a: Relationship between shop worker knowledge of Ministry of Health recommended first-line anti-malarial therapy and malaria training and dispensing practices**

|                                                              |     | % who correctly identified the<br>n first-line anti-malarial therapy | Unadjusted odds ratio and (95%<br>confidence interval; P value) |
|--------------------------------------------------------------|-----|----------------------------------------------------------------------|-----------------------------------------------------------------|
| <b>Malaria training</b>                                      |     |                                                                      |                                                                 |
| Attended malaria workshop                                    |     |                                                                      |                                                                 |
|                                                              | Yes | 46 65%                                                               | 0.94 (0.42 - 2.07; 0.873)                                       |
|                                                              | No  | 66 67%                                                               | Ref                                                             |
| Attended malaria workshop after 2006                         |     |                                                                      |                                                                 |
|                                                              | Yes | 34 62%                                                               | 0.32 (0.06 - 1.71; 0.184)                                       |
|                                                              | No  | 12 83%                                                               | Ref                                                             |
| Received drug information from MOH                           |     |                                                                      |                                                                 |
|                                                              | Yes | 94 69%                                                               | 0.96 (0.85 - 1.08; 0.483)                                       |
|                                                              | No  | 19 53%                                                               | Ref                                                             |
| <b>Dispensing Practices</b>                                  |     |                                                                      |                                                                 |
| Recommended AL for uncomplicated malaria in children under 5 |     |                                                                      |                                                                 |
|                                                              | Yes | 43 74%                                                               | 2.41 (1.01 - 5.76; 0.048)*                                      |
|                                                              | No  | 53 55%                                                               | Ref                                                             |
| Recommend AL for uncomplicated malaria in adults             |     |                                                                      |                                                                 |
|                                                              | Yes | 55 76%                                                               | 3.55 (1.49 - 8.47; 0.004)*                                      |
|                                                              | No  | 42 48%                                                               | Ref                                                             |

**Table 4b: Relationship between shop worker recommendation of AL to children under 5 and their response to clinical scenarios**

|                                            |     | % who would recommend AL<br>n to children under 5 | Unadjusted odds ratio and (95%<br>confidence interval; P value) |
|--------------------------------------------|-----|---------------------------------------------------|-----------------------------------------------------------------|
| <b>Pediatric Case Management**</b>         |     |                                                   |                                                                 |
| Refer pediatric patients rather than treat |     |                                                   |                                                                 |
|                                            | Yes | 43 49%                                            | 2.45 (1.04 - 5.79; 0.041)*                                      |
|                                            | No  | 65 31%                                            | Ref                                                             |
| Refuse Fansidar to a mother requesting it  |     |                                                   |                                                                 |
|                                            | Yes | 94 67%                                            | 3.59 (1.08 - 11.90; 0.036)*                                     |
|                                            | No  | 19 58%                                            | Ref                                                             |

\*denotes statistical significance

\*\*self-reported responses to open-ended clinical scenario
